# Supplementary material
Source: PubMed Central journal article supplement (PMC2669332)
Supplement: 0811741106_0811741106SI.pdf [file 0811741106_0811741106SI.pdf]

# Supporting Information

Köhler et al. 10.1073/pnas.0811741106

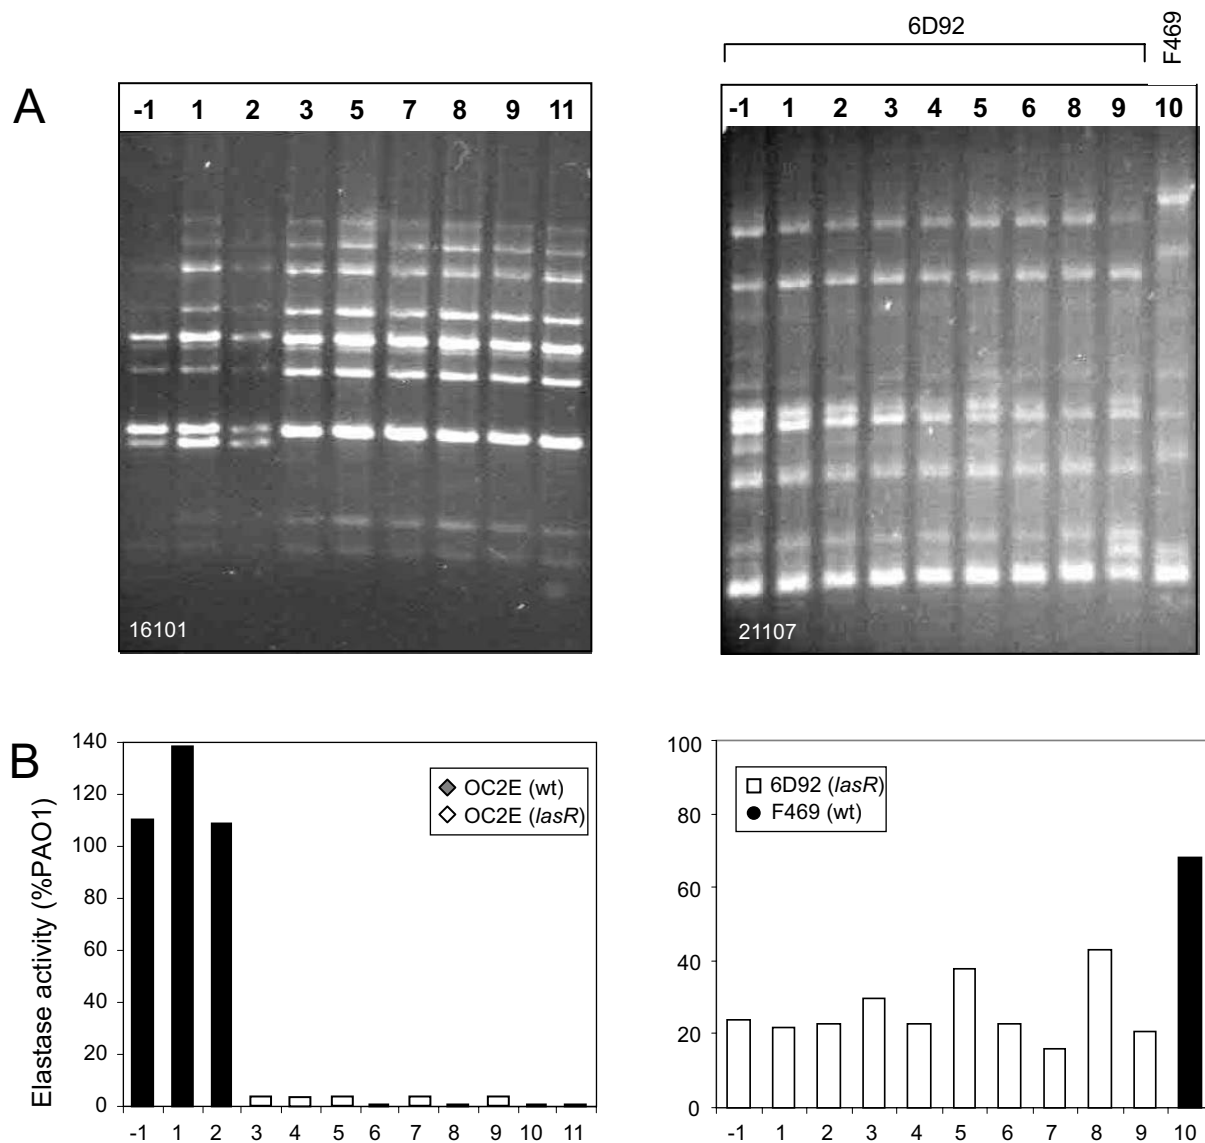

**Fig. S1.** RAPD and elastase activity of isolates from patients 16101 and 21107. (A) RAPD analysis and determination of the genotype were performed as described in *Materials and Methods*. (B) Elastase activities of isolates were determined by the ECR assay and results (mean of 2 determinations) are given as percentage of strain PAO1.
